# Supplementary material
Source: bioRxiv or medRxiv preprint supplement (https://medrxiv.org/highwire/filestream/82045/field_highwire_adjunct_files/2/2020.05.18.20099960-3.pdf)

# COVID-19 Patient Timelines (n=65)

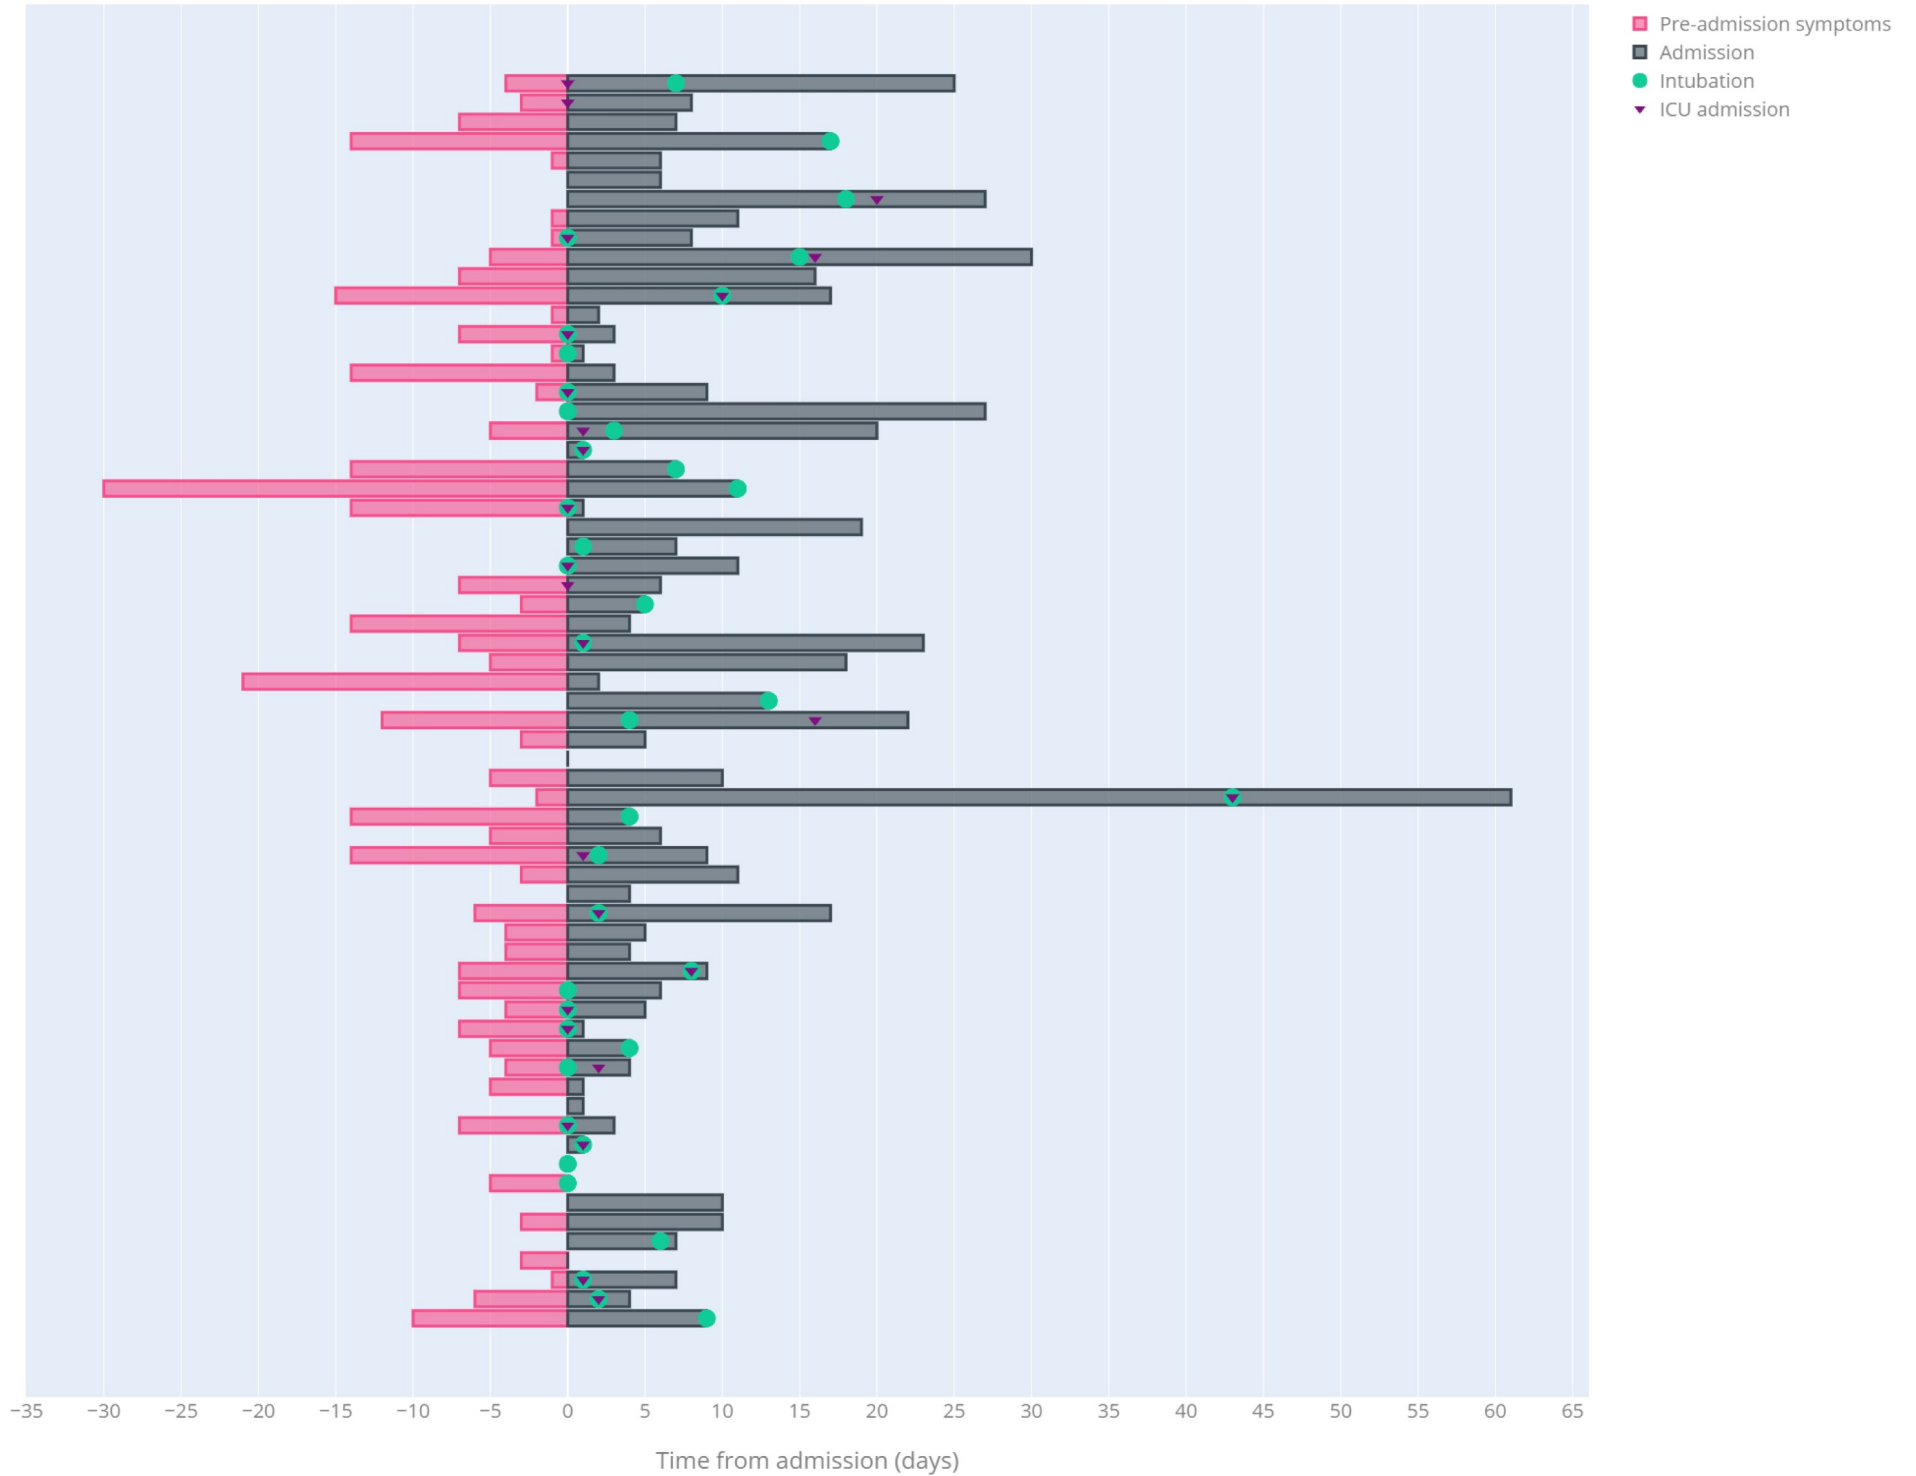

Supplement: Supplementary file [file 2020.05.18.20099960-3.pdf]
